# Supplementary material for: Ultrathin electrochemical layer tailoring of lithiophilic materials with 3D hierarchical configuration for lithium metal batteries: Sn/Cu6Sn5@Cu2+1O nanowires on Cu foam
Source: Royal Society of Chemistry journal article supplement (doi:10.1039/d2ta08626c), 2023-01-01
Supplement: d2ta08626c1.pdf [file d2ta08626c1.pdf]

Supplementary Information

**Ultrathin electrochemical layer tailoring of lithiophilic materials  
on 3D hierarchical configuration for lithium metal battery:  
Sn/Cu<sub>6</sub>Sn<sub>5</sub>@Cu<sub>2+1</sub>O nanowires on Cu foam**

*Garam Lee, Jaeyun Ha, Jinhee Lee, Yong-Tae Kim\*, Jinsub Choi\**

Department of Chemistry and Chemical Engineering  
Inha University, 22212, Incheon, Republic of Korea

\*To whom correspondence should be addressed.

Tel: +82-32-860-7476

e-mail: yongtaekim@inha.ac.kr, jinsub@inha.ac.kr

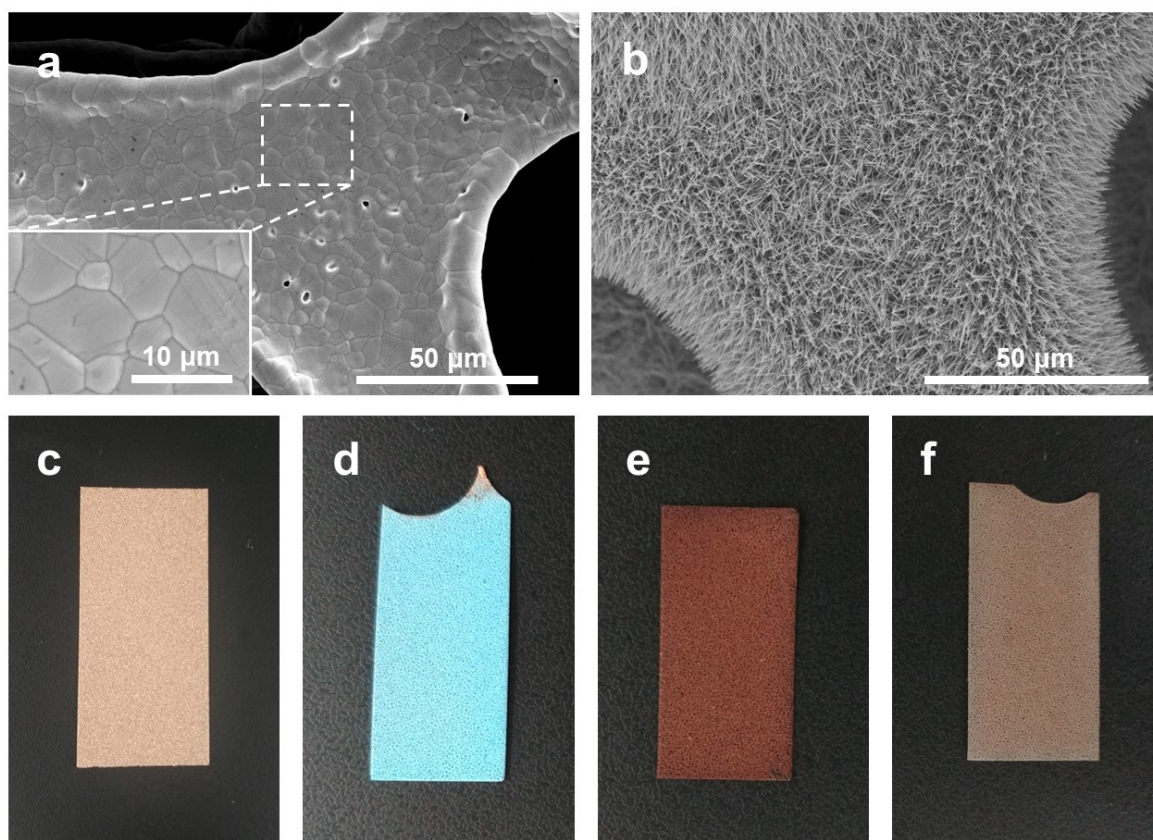

**Figure S1.** (a) SEM images of bare CF (inset of the enlarged view). (b) Low-magnification SEM image after anodization and the photographs of (c) bare CF, (d)  $\text{Cu}(\text{OH})_2$  NW, (e) H-CF, and (f) SCC@H-CF.

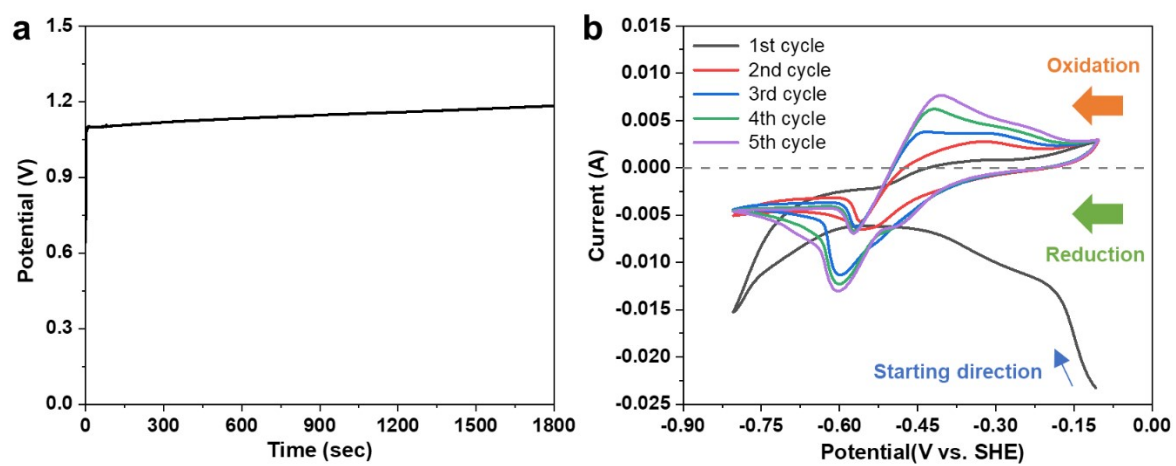

**Figure S2.** (a) Voltage–time transient during anodization under constant current density. (b) Cyclic Voltammetry for the deposition of Sn on H-CF.

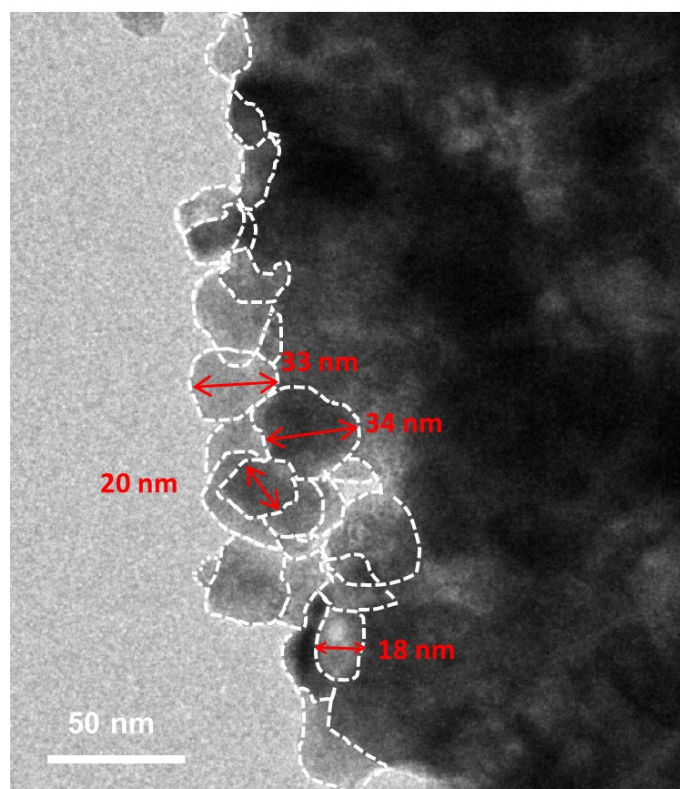

**Figure S3.** TEM image showing the size of the  $\text{Cu}_6\text{Sn}_5/\text{Sn}$  alloy composite particles from SCC@H-CF.

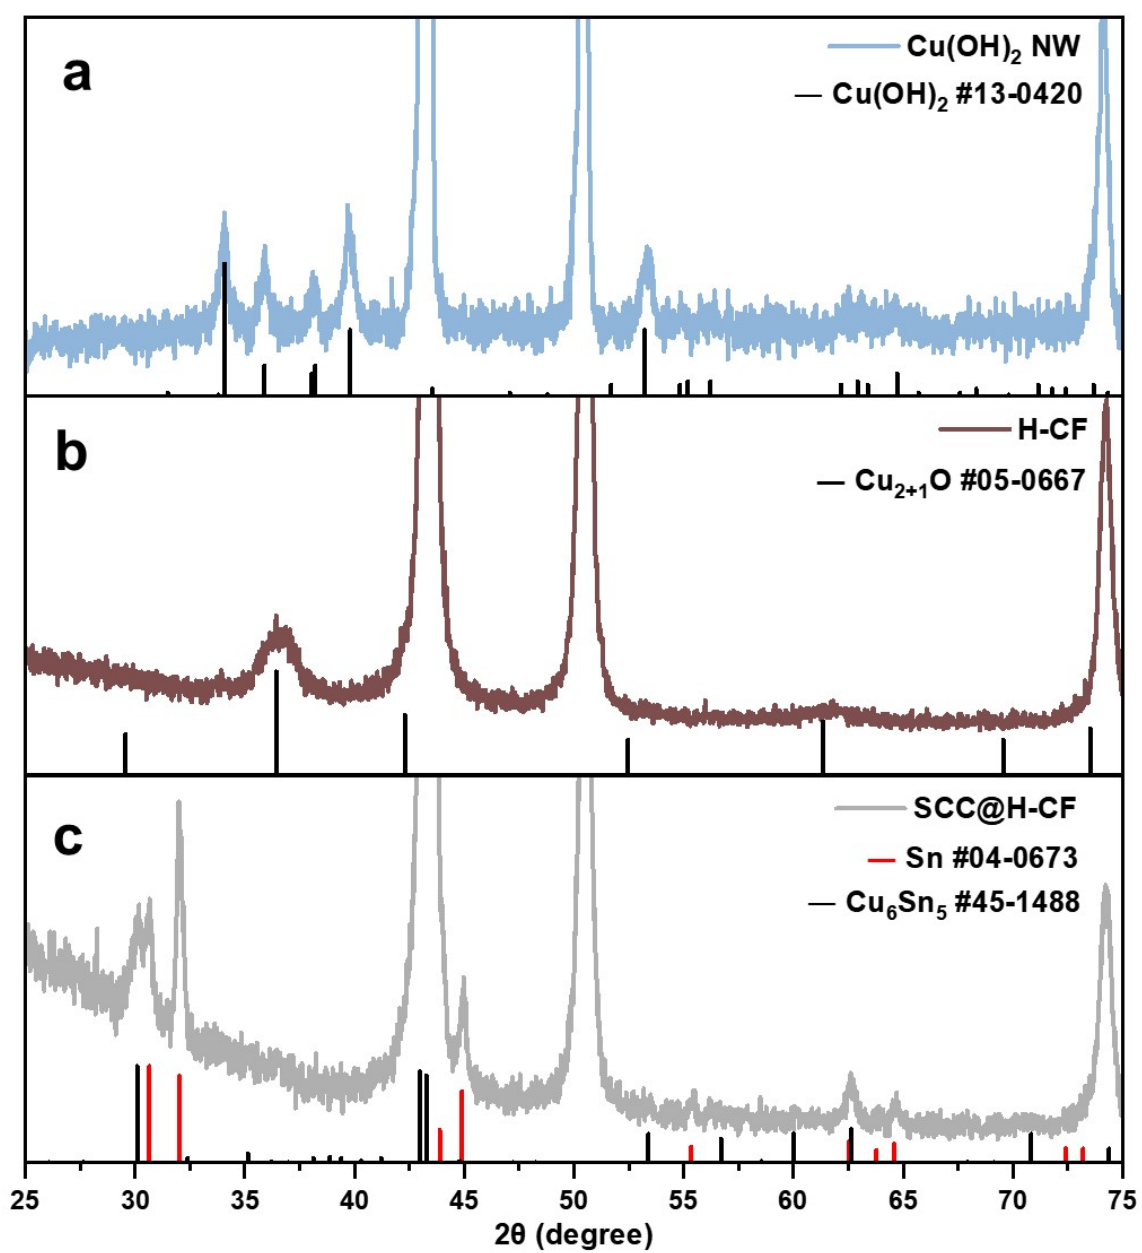

**Figure S4.** Enlarged XRD results for  $\text{Cu(OH)}_2$  NW, H-CF, and SCC@H-CF.

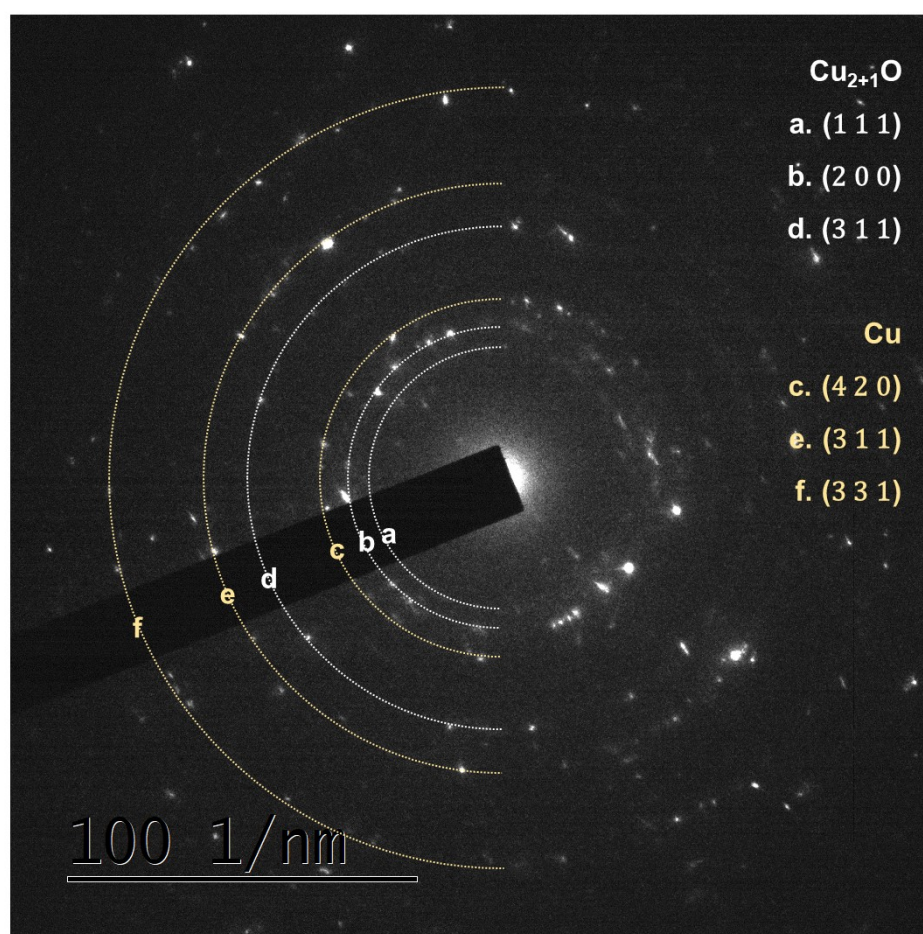

**Figure S5.** SAED pattern of H-CF.



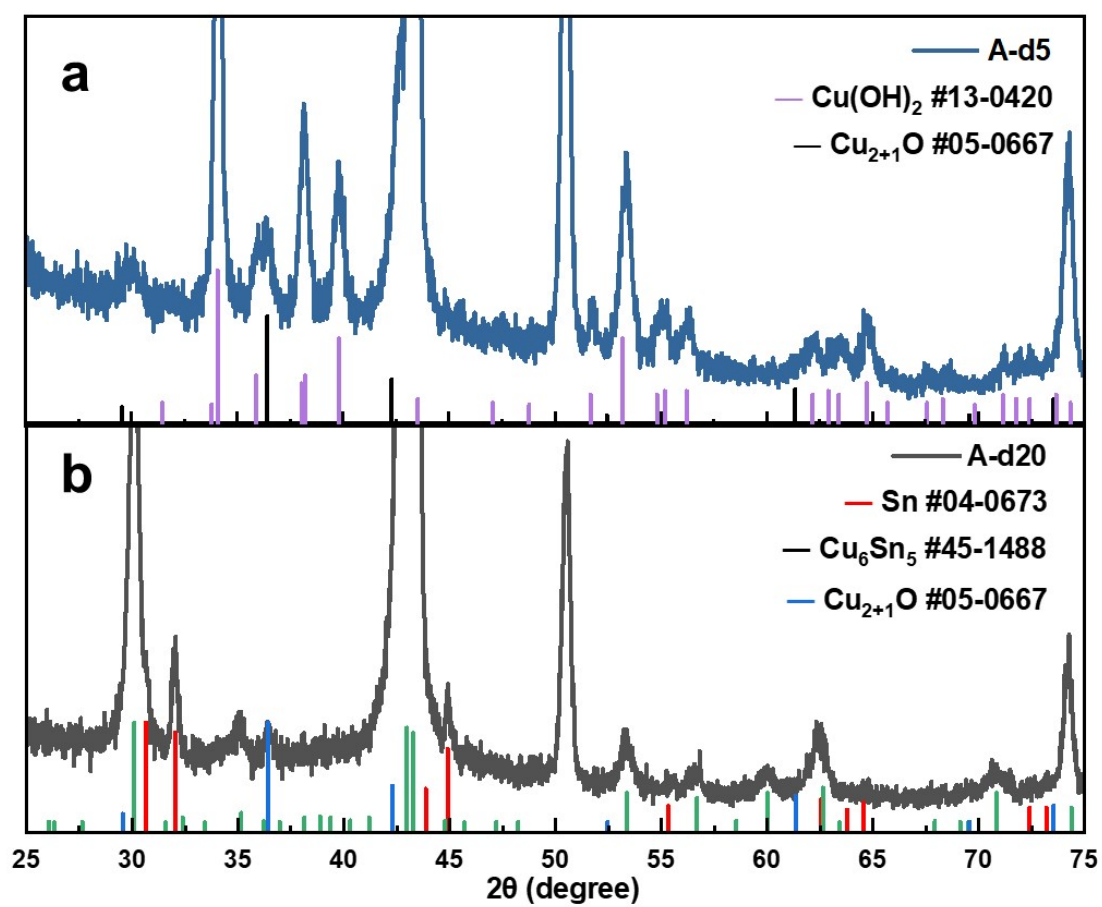

**Figure S6.** Enlarged XRD results of (a) A-d5 and (b) A-d20.

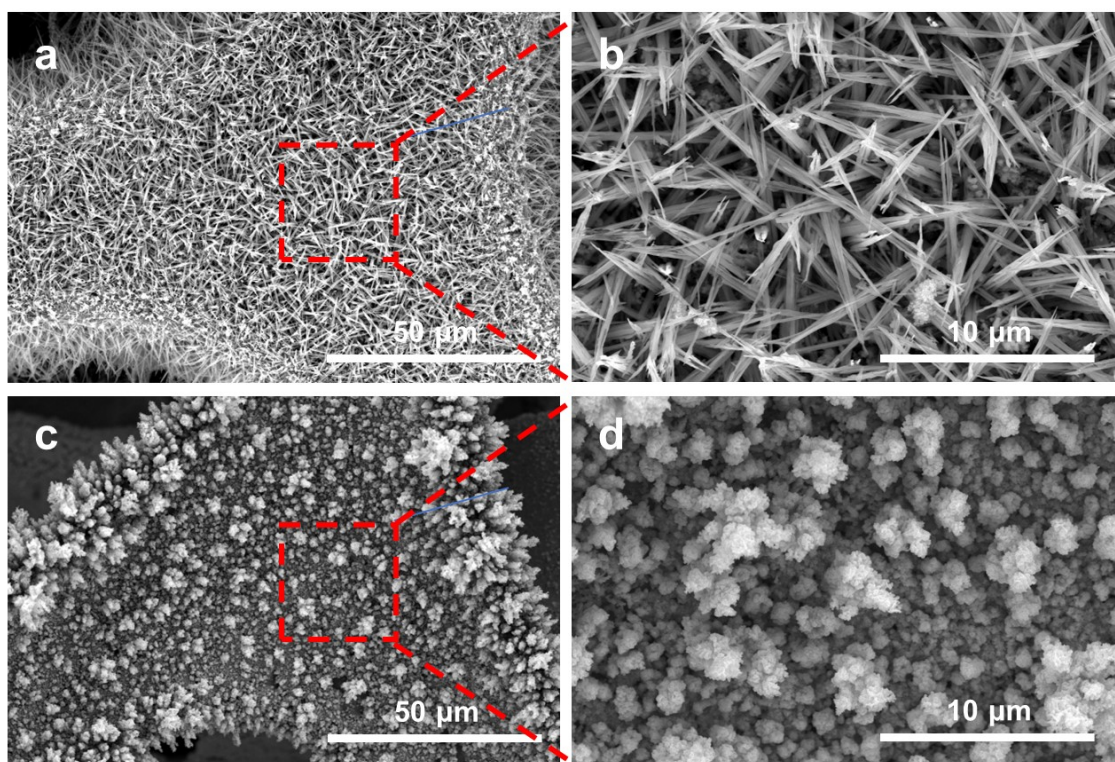

**Figure S7.** SEM images of (a–b) A-d5 and (c–d) A-d20 after CV deposition.



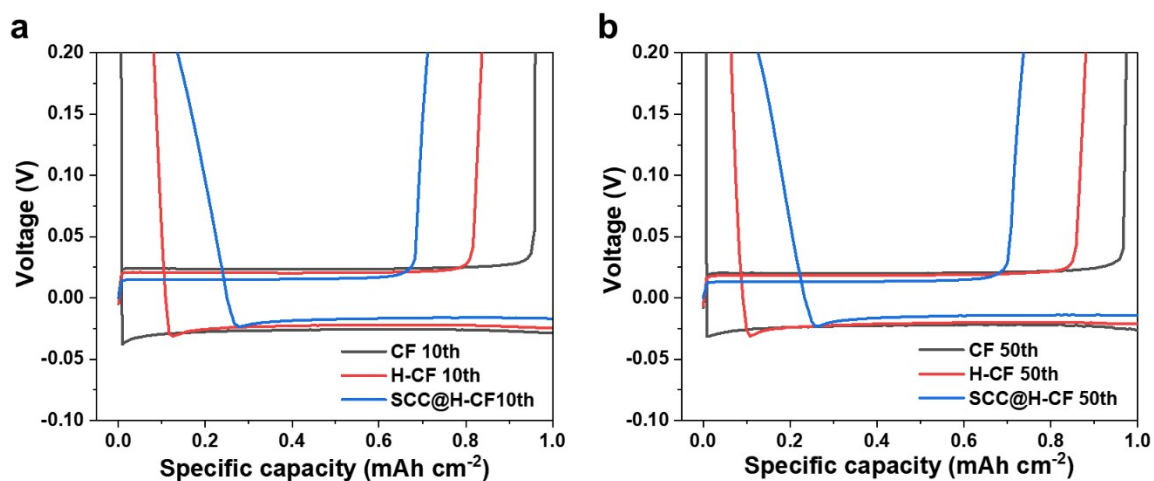

**Figure S8.** Charge/discharge profiles of CF, H-CF, and SCC@H-CF electrodes at (a) 10th and (b) 50th cycles at a current density of 1 mA cm<sup>-2</sup> with a capacity of 1 mAh cm<sup>-2</sup>.

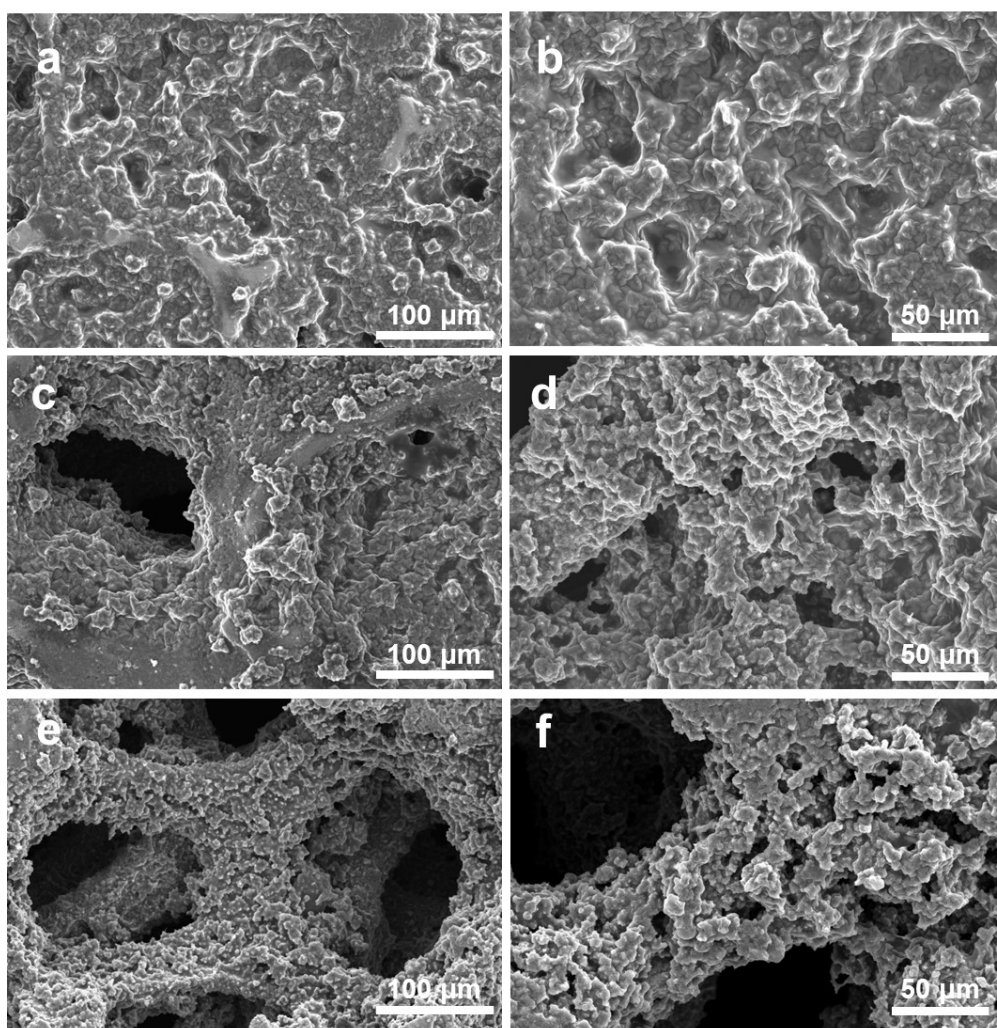

**Figure S9.** SEM images of (a-b) CF, (c-d) H-CF, and (e-f) SCC@H-CF with capacity of 1 mAh cm<sup>-2</sup> at 1 mA cm<sup>-2</sup> after stripping at 30 cycles.

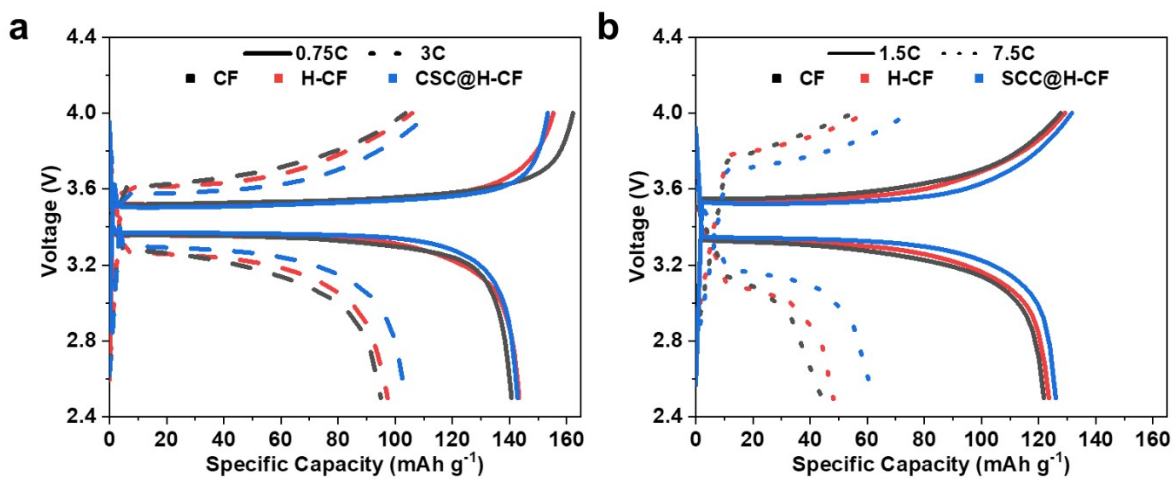

**Figure S10.** Galvanostatic charge/discharge profiles of the SCC@H-CF || LFP full cell at (a) 0.75, 3 C, and (b) 1.5, 7.5 C.

**Table S1.** Voltage hysteresis values of the electrodes after a specific number of cycles.

| <b>Samples</b>                | <b>SCC@H-CF</b> | <b>H-CF</b> | <b>CF</b> |
|-------------------------------|-----------------|-------------|-----------|
| <b>1<sup>st</sup> cycle</b>   | 6.0 mV          | 7.1 mV      | 8.4 mV    |
| <b>10<sup>th</sup> cycle</b>  | 3.3 mV          | 4.3 mV      | 5.0 mV    |
| <b>100<sup>th</sup> cycle</b> | 3.1 mV          | 4.1 mV      | 4.9 mV    |

**Table S2.** Internal resistance of the electrodes after a specific number of cycles.

| <b>Samples</b>               | <b>SCC@H-CF</b> | <b>H-CF</b>    | <b>CF</b>      |
|------------------------------|-----------------|----------------|----------------|
| <b>1<sup>st</sup> cycle</b>  | 7.29 $\Omega$   | 11.41 $\Omega$ | 20.50 $\Omega$ |
| <b>50<sup>th</sup> cycle</b> | 1.33 $\Omega$   | 1.45 $\Omega$  | 4.90 $\Omega$  |
